# Supplementary material for: Hydride abstraction in positive-ion electrospray interface: oxidation of 1,4-dihydropyridines in electrospray ionization mass spectrometry
Source: Royal Society of Chemistry journal article supplement (doi:10.1039/c1an15129k), 2011-01-01
Supplement: c1an15129k.pdf [file c1an15129k.pdf]

**Analyst**

**Electronic Supplementary Material**

Hydride abstraction in positive-ion electrospray interface: oxidation of 1,4-dihydropyridines in electrospray ionization mass spectrometry

Yunfeng Chai, Hezhi Sun, Jieping Wan, Yuanjiang Pan\* and Cuirong Sun\*

panyuanjiang@zju.edu.cn

## Contents

- **Figure S1.** Full-scan APCI-IT mass spectrum of compound **1**.
- **Figure S2.** Full-scan ESI-IT mass spectra of compound **1** with the solvent as (a) CH<sub>3</sub>CN, (b) CH<sub>3</sub>OH, (c) CH<sub>3</sub>CN-H<sub>2</sub>O (1: 1, v/v), (d) CH<sub>3</sub>OH-H<sub>2</sub>O (1: 1, v/v).
- **Figure S3.** HPLC chromatogram (a) and EIC chromatograms of ions at  $m/z$  338 (b) and  $m/z$  336 (c) of compound **1** determined by HPLC-MS method.
- **Figure S4.** Full-scan ESI-FTICR mass spectrum of compound **1**.
- **Figure S5.** Cyclic voltammogram (scan rate 0.1 V s<sup>-1</sup>) of compound **1** (1 mmol L<sup>-1</sup>) obtained in acetonitrile using 0.1 M (TBA)PF<sub>6</sub> as the supporting electrolyte.
- **Figure S6.** CID mass spectra of the [M + H]<sup>+</sup> ions of (a) compound **1**, (b) compound **2**, (c) compound **3**.
- **Figure S7.** Full-scan ESI-IT mass spectra of (a) compound **2**, (b) compound **3**.

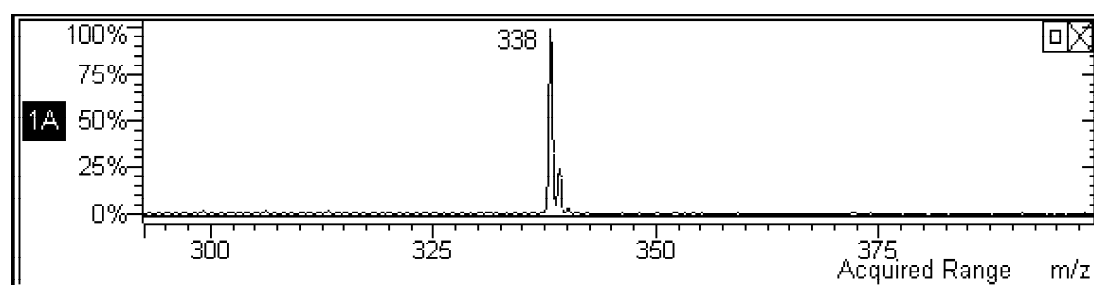

**Figure S1.** Full-scan APCI-IT mass spectrum of compound **1**.

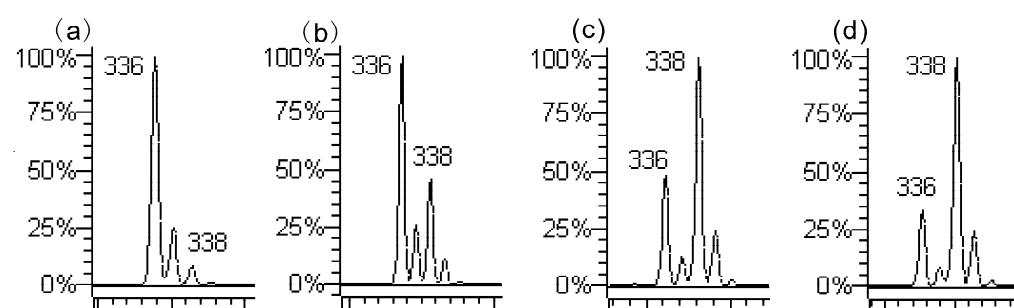

**Figure S2.** Full-scan ESI-IT mass spectra of compound **1** with the solvent as (a) CH<sub>3</sub>CN, (b) CH<sub>3</sub>OH, (c) CH<sub>3</sub>CN-H<sub>2</sub>O (1: 1, v/v), (d) CH<sub>3</sub>OH-H<sub>2</sub>O (1: 1, v/v).

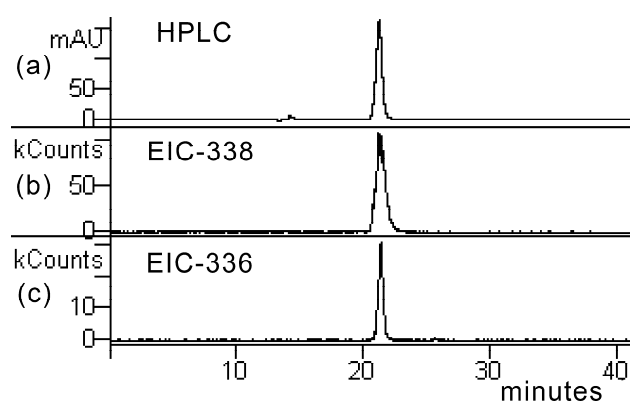

**Figure S3.** HPLC chromatogram (a) and EIC chromatograms of ions at  $m/z$  338 (b) and  $m/z$  336 (c) of compound **1** determined by HPLC-MS method.

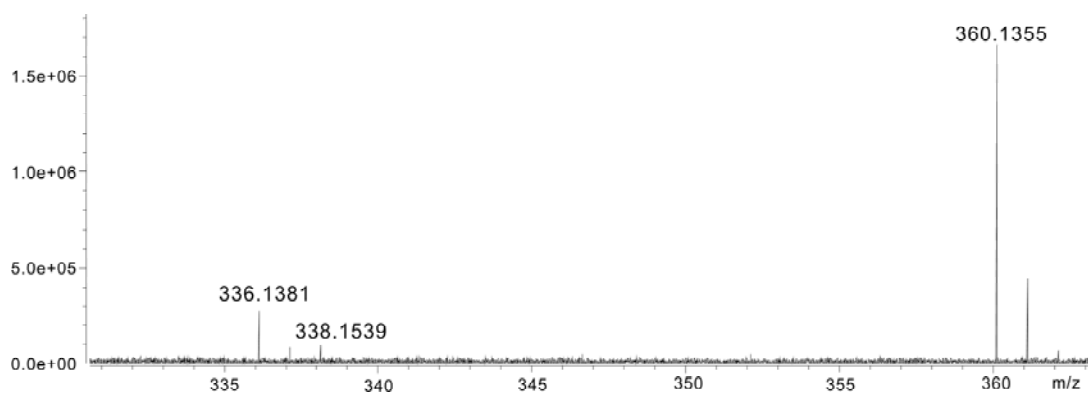

**Figure S4.** Full-scan ESI-FTICR mass spectrum of compound **1**.

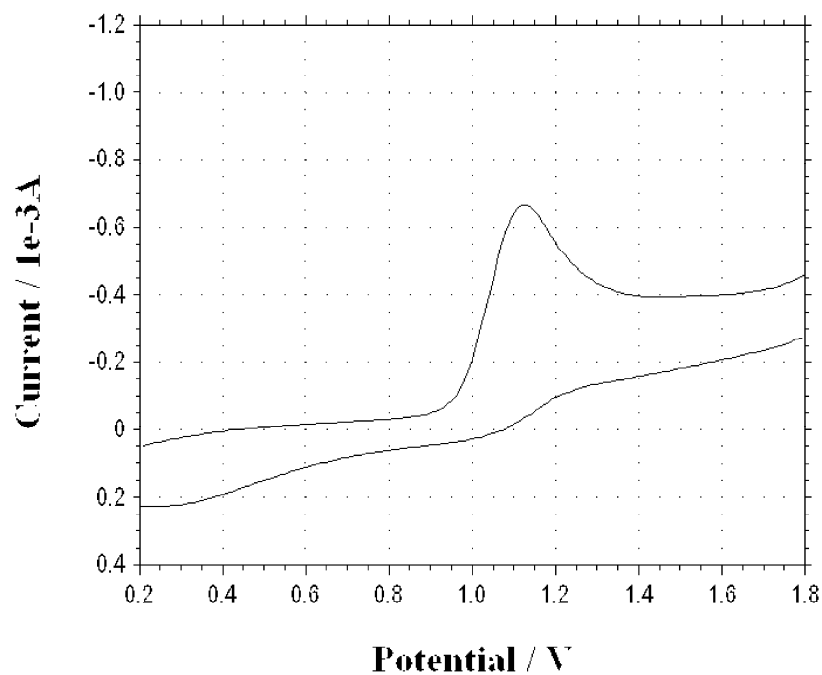

**Figure S5.** Cyclic voltammogram (scan rate  $0.1 \text{ V s}^{-1}$ ) of compound **1** ( $1 \text{ mmol L}^{-1}$ ) obtained in acetonitrile using  $0.1 \text{ M (TBA)PF}_6$  as the supporting electrolyte.

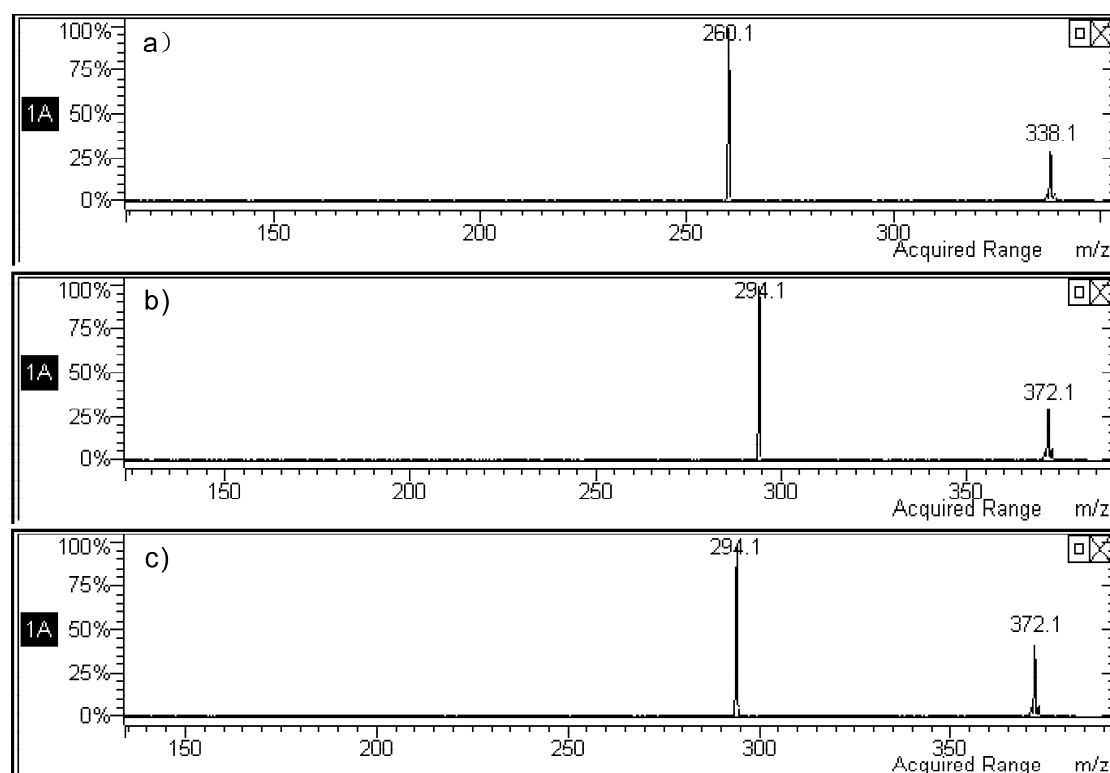

**Figure S6.** CID mass spectra of the  $[M + H]^+$  ions of (a) compound **1**, (b) compound **2**, (c) compound **3**.

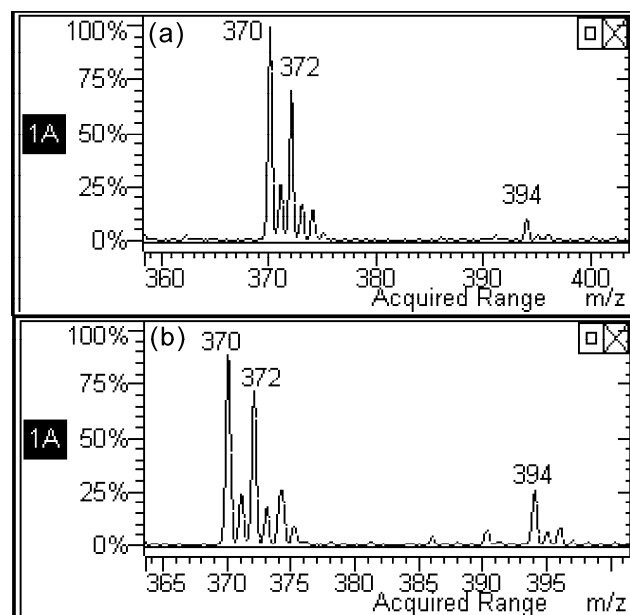

**Figure S7.** Full-scan ESI-IT mass spectra of (a) compound **2**, (b) compound **3**.
